# Supplementary material for: A global spatially Continuous Solar Induced Fluorescence (CSIF) dataset using neural networks
Source: Copernicus journal article supplement (doi:10.5194/bg-2018-255), 2018-06-22
Supplement: Supplementary file 1 [file Table S1.xlsx]

## Sheet: GPP_SIF_COMPARE_ALL_stat
					all daily CSIF					site CSIF					clear daily CSIF
SITE_ID	SITE_NAME	LOCATION_LAT	LOCATION_LONG	IGBP	slope	intercept	slope_no_intercept	r_square	RMSE	slope	intercept	slope_no_intercept	r_square	RMSE	slope	intercept	slope_no_intercept	r_square	RMSE	Year used	References
AR-Vir	Virasoro	-28.2395	-56.1886	ENF	30.855	1.94062	39.826	0.549588	1.82074	33.2344	2.0816	43.8552	0.518963	1.88804	37.4523	-0.645763	34.7964	0.580669	1.67108	2010, 2011, 2012	(Posse et al., 2016)
AU-ASM	Alice Springs	-22.283	133.249	ENF	57.3157	0.642872	68.5885	0.886607	0.734153	60.1288	0.641369	72.1048	0.872406	0.748991	52.4902	0.6305	62.7535	0.886627	0.723526	2010, 2011, 2012, 2013	(Cleverly, 2011)
AU-Cpr	Calperum	-34.0021	140.589	SAV	22.1062	0.677457	34.5087	0.482298	0.569313	20.262	0.770306	34.4093	0.414653	0.620303	21.9326	0.608928	32.5702	0.469111	0.55223	2010, 2011, 2012, 2013, 2014	(Calperum Tech, 2013)
AU-Cum	Cumberland Plains	-33.6133	150.722	EBF	11.3009	1.75502	21.8986	0.383525	0.85824	11.0033	1.83088	22.3404	0.325764	0.885957	13.7539	1.05913	19.4726	0.47575	0.675565	2012, 2013, 2014	(Pendall, 2015)
AU-DaS	Daly River Cleared	-14.1593	131.388	SAV	24.8124	0.537771	27.8074	0.603013	1.28456	26.9046	0.584808	30.4784	0.5904	1.30727	20.2227	0.87698	24.3934	0.666269	1.22177	2008, 2009, 2010, 2011, 2012, 2013, 2014	(Beringer, 2013)
AU-Dry	Dry River	-15.2588	132.371	SAV	25.456	-0.0531521	25.0961	0.529906	1.11814	29.1453	-0.326501	26.7606	0.516294	1.13854	20.6842	0.450015	23.5143	0.485306	1.18176	2008, 2009, 2010, 2011, 2012, 2013, 2014	(Beringer, 2013)
AU-Gin	Gingin	-31.3764	115.714	WSA	23.1166	1.07437	33.2663	0.281179	0.993978	24.6852	0.893971	33.1303	0.275657	0.982224	30.0584	0.249105	32.3581	0.342596	0.915907	2011, 2012, 2013, 2014	-
AU-Rob	Robson Creek, Queensland, Australia	-17.1175	145.63	EBF	3.27193	5.1176	20.1187	0.0887219	2.04255	3.12229	5.23754	21.8096	0.0772943	2.19319	5.00653	4.25027	16.6078	0.136116	1.37941	2014	(Liddell, 2013)
AU-Stp	Sturt Plains	-17.1507	133.35	GRA	24.0913	0.109897	25.004	0.600866	0.87948	23.501	0.255067	25.6752	0.566463	0.921596	23.1863	0.0298456	23.4162	0.657943	0.813212	2008, 2009, 2010, 2011, 2012, 2013, 2014	-
AU-Whr	Whroo	-36.6732	145.029	EBF	3.96245	3.2571	30.1363	0.0392152	1.79664	3.10223	3.33941	29.6209	0.0249352	1.84371	0.037312	3.64196	25.6205	4.32688e-06	1.90921	2011, 2012, 2013, 2014	(Beringer, 2013)
AU-Wom	Wombat	-37.4222	144.094	EBF	33.4282	0.650884	37.0743	0.675898	1.20312	30.3282	0.979305	35.6081	0.618755	1.32192	41.399	-3.4089	26.8732	0.501484	1.56277	2010, 2011, 2012	-
AU-Ync	Jaxa	-34.9893	146.291	GRA	12.3576	-0.0966138	11.9073	0.878556	0.459168	12.2464	-0.137894	11.6115	0.862155	0.491594	12.3268	-0.213349	11.3668	0.901776	0.42587	2012, 2013	-
CA-Qfo	Quebec - Eastern Boreal, Mature Black Spruce	49.6925	-74.3421	ENF	28.3698	0.875687	36.2774	0.709072	0.960485	28.9158	0.867984	36.8744	0.715367	0.95061	22.1092	0.351198	24.239	0.841466	0.65365	2003, 2004, 2005, 2006, 2007, 2008, 2009, 2010	(Bergeron et al., 2006)
CH-Lae	Laegeren	47.4781	8.365	MF	23.5298	1.12106	27.479	0.695741	1.95572	23.0339	1.29561	27.6286	0.667737	2.06353	20.0695	0.176689	20.5471	0.720597	1.80133	2004, 2005, 2006, 2007, 2008, 2009, 2010, 2011, 2012, 2013, 2014	(Göckede et al., 2008)
CH-Oe1	Oensingen grassland	47.2858	7.7319	GRA	30.4499	1.27445	36.5065	0.586672	2.53502	31.3853	1.36463	38.1536	0.57836	2.57392	23.9742	0.4958	25.7009	0.575341	2.48479	2002, 2003, 2004, 2005, 2006, 2007, 2008	(Ammann et al., 2007)
CN-Cng	Changling	44.5934	123.509	GRA	20.6471	0.552214	24.0566	0.666314	1.24555	21.4331	0.49746	24.63	0.661593	1.24027	17.1911	0.405436	19.1248	0.773983	1.01448	2007, 2008, 2009, 2010	(Dong et al., 2011)
CN-Du2	Duolun_grassland (D01)	42.0467	116.284	GRA	21.732	0.28237	23.5567	0.916393	0.546655	22.6798	0.285128	24.6019	0.916665	0.546775	15.5186	0.278856	16.798	0.926217	0.517674	2007, 2008	(Chen et al., 2009)
DE-Hai	Hainich	51.0792	10.453	DBF	26.6486	0.997346	30.0383	0.605206	2.56288	26.5363	1.11727	30.3292	0.630411	2.49559	19.5392	0.105228	19.7755	0.676066	2.28685	2000, 2001, 2002, 2003, 2004, 2005, 2006, 2007, 2008, 2009, 2010, 2011, 2012	(Knohl et al., 2003)
DE-Spw	Spreewald	51.8923	14.0337	WET	33.4635	-0.231877	32.5528	0.865136	1.55618	32.4694	-0.134995	31.9529	0.87135	1.51662	24.9446	-0.6076	23.2354	0.910162	1.30757	2010, 2011, 2012, 2013, 2014	-
DK-Sor	Soroe	55.4859	11.6446	DBF	32.8681	1.20964	37.0094	0.776302	2.63293	33.0898	1.26325	37.4584	0.77349	2.65902	26.0026	0.596027	27.5507	0.812578	2.3346	2000, 2001, 2002, 2003, 2004, 2005, 2006, 2007, 2008, 2009, 2010, 2011, 2012, 2013, 2014	(Pilegaard et al., 2011)
FI-Hyy	Hyytiala	61.8475	24.295	ENF	40.0257	0.759235	45.5087	0.788228	1.40944	40.575	0.614893	44.966	0.81633	1.2963	30.4142	0.164273	31.2428	0.85783	1.103	2000, 2001, 2002, 2003, 2004, 2005, 2006, 2007, 2008, 2009, 2010, 2011, 2012, 2013, 2014	(Vesala et al., 2005)
FI-Sod	Sodankyla	67.3619	26.6378	ENF	26.4163	1.09661	34.5781	0.74771	1.1907	24.8963	1.09396	32.5861	0.752683	1.1552	18.4109	0.886826	22.8759	0.756987	1.07247	2001, 2002, 2003, 2004, 2005, 2006, 2007, 2008, 2009, 2010, 2011, 2012, 2013, 2014	(Suni et al., 2003)
FR-Pue	Puechabon	43.7414	3.5958	EBF	16.8839	1.39727	25.7143	0.383703	1.52496	16.7978	1.39502	25.6136	0.373393	1.5319	17.341	0.831171	21.8761	0.435544	1.36436	2000, 2001, 2002, 2003, 2004, 2005, 2006, 2007, 2008, 2009, 2010, 2011, 2012, 2013, 2014	(Rambal et al. 2004)
IT-CA1	Castel d'Asso 1	42.3804	12.0266	DBF	14.7016	1.48239	22.0716	0.148135	2.61984	10.9399	1.99851	20.325	0.0887123	2.75104	11.3349	1.64468	18.1037	0.126128	2.6647	2011, 2012, 2013, 2014	(Sabbatini et al., 2016)
IT-CA3	Castel d'Asso 3	42.38	12.0222	DBF	22.1916	0.768493	25.9132	0.181479	3.49192	17.5141	1.40913	23.9974	0.121889	3.64348	15.3038	1.29603	20.2507	0.146542	3.59041	2011, 2012, 2013, 2014	(Sabbatini et al., 2016)
IT-Ro1	Roccarespampani 1	42.4081	11.93	DBF	19.357	1.40175	25.566	0.345613	2.81908	20.2465	1.38794	26.6639	0.345768	2.81623	15.1412	1.55274	20.8199	0.308132	2.91379	2000, 2001, 2002, 2003, 2004, 2005, 2006, 2007, 2008	(Rey et al., 2002)
IT-Tor	Torgnon	45.8444	7.5781	GRA	27.084	-0.453149	25.2255	0.754775	1.38681	26.616	-0.490974	24.6268	0.707274	1.51416	20.1896	-0.765777	17.9188	0.714951	1.50951	2008, 2009, 2010, 2011, 2012, 2013, 2014	(Galvagno et al., 2013)
JP-MBF	Moshiri Birch Forest Site	44.3869	142.319	DBF	19.647	0.14631	20.1115	0.848034	1.14742	20.004	0.348427	21.1579	0.838564	1.1941	13.1865	0.0879912	13.3718	0.866823	1.07283	2004, 2005	(Matsumoto et al., 2008)
RU-Che	Cherski	68.613	161.341	WET	19.5723	-0.191229	18.5734	0.847465	0.657271	19.2622	-0.175975	18.342	0.792107	0.764506	16.849	-0.757496	13.8021	0.853206	0.707631	2002, 2003, 2004, 2005	(Merbold et al., 2009)
RU-Fyo	Fyodorovskoye	56.4615	32.9221	ENF	36.6189	1.46502	45.5296	0.743509	2.0086	35.4725	1.45233	43.9374	0.761082	1.9532	25.4851	0.979244	29.3756	0.821814	1.58982	2000, 2001, 2002, 2003, 2004, 2005, 2006, 2007, 2008, 2009, 2010, 2011, 2012, 2013, 2014	(Kurbatova et al., 2008)
RU-Ha1	Hakasia steppe	54.7252	90.0022	GRA	21.16	0.367877	23.3446	0.875569	0.676453	23.0985	0.418187	25.8261	0.876243	0.68628	17.2145	0.25514	18.4288	0.874829	0.658844	2002, 2003, 2004	(Marchesini et al., 2007)
US-AR2	ARM USDA UNL OSU Woodward Switchgrass 2	36.6358	-99.5975	GRA	23.3949	0.178546	24.9022	0.589674	1.11859	24.634	0.139722	25.8716	0.585361	1.12229	20.1311	0.162846	21.3162	0.582825	1.12685	2009, 2010, 2011, 2012	(Billesbach & Bradford, 2016)
US-Blo	Blodgett Forest	38.8953	-120.633	ENF	25.9431	0.495897	29.668	0.545237	1.1556	25.2461	0.548918	29.3085	0.545829	1.15921	30.1247	-0.956546	23.9762	0.479627	1.24329	2000, 2001, 2002, 2003, 2004, 2005, 2006, 2007	(Goldstein et al., 2000)
US-KS2	Kennedy Space Center (scrub oak)	28.6086	-80.6715	CSH	15.5475	1.88118	23.7823	0.564545	1.09328	17.669	1.78271	26.3266	0.561718	1.07147	14.5243	1.65355	20.8771	0.606546	1.00985	2003, 2004, 2005, 2006	(Li et al., 2003)
US-MMS	Morgan Monroe State Forest	39.3232	-86.4131	DBF	22.3174	0.487336	23.5664	0.749525	1.95969	23.1655	0.426869	24.29	0.767874	1.88475	19.0969	-0.498211	18.1071	0.810073	1.70826	2000, 2001, 2002, 2003, 2004, 2005, 2006, 2007, 2008, 2009, 2010, 2011, 2012, 2013, 2014	(Brzostek et al., 2014)
US-Prr	Poker Flat Research Range Black Spruce Forest	65.1237	-147.488	ENF	13.6459	0.977225	19.1087	0.491016	1.03838	12.2468	1.06593	17.73	0.499837	1.05529	9.93569	0.632187	12.1084	0.713793	0.764922	2011, 2012, 2013	(Nakai et al., 2013)
US-Ton	Tonzi Ranch	38.4316	-120.966	WSA	26.083	-0.0516651	25.745	0.728478	1.03822	26.4233	-0.0503209	26.09	0.730129	1.03505	23.9262	0.0519043	24.2442	0.719158	1.0559	2001, 2002, 2003, 2004, 2005, 2006, 2007, 2008, 2009, 2010, 2011, 2012, 2013, 2014	(Ma et al., 2016)
US-Whs	Walnut Gulch Lucky Hills Shrub	31.7438	-110.052	OSH	32.2923	0.248728	37.0526	0.707355	0.535747	33.926	0.252612	39.0306	0.699431	0.542982	28.4354	0.221718	32.1025	0.730777	0.511089	2007, 2008, 2009, 2010, 2011, 2012, 2013, 2014	(Scott et al, 2015)
US-Wi4	Mature red pine (MRP)	46.7393	-91.1663	ENF	17.0499	2.92849	27.4026	0.734726	1.77437	18.1166	2.90141	29.0376	0.712473	1.78049	15.1614	2.43634	22.2705	0.730065	1.55014	2002, 2003, 2004, 2005	(Noormets et al., 2008)
ZA-Kru	Skukuza	-25.0197	31.4969	SAV	21.3774	0.330163	22.8953	0.584353	1.76397	24.3224	0.311859	25.9758	0.550956	1.83155	17.1345	0.334592	18.3481	0.619315	1.68956	2000, 2001, 2002, 2003, 2004, 2005, 2006, 2007, 2008, 2009, 2010	(Archibald et al., 2009)
References
Ammann, C., Flechard, C. R., Leifeld, J., Neftel, A. and Fuhrer, J.: The carbon budget of newly established temperate grassland depends on management intensity, Agriculture, Ecosystems & Environment, 121(1–2), 5–20, doi:10.1016/j.agee.2006.12.002, 2007.
Archibald, S. A., Kirton, A., van der Merwe, M. R., Scholes, R. J., Williams, C. A. and Hanan, N.: Drivers of inter-annual variability in Net Ecosystem Exchange in a semi-arid savanna ecosystem, South Africa, Biogeosciences, 6(2), 251–266, doi:10.5194/bg-6-251-2009, 2009.
Bergeron, O., Margolis, H. A., Black, T. A., Coursolle, C., Dunn, A. L., Barr, A. G. and Wofsy, S. C.: Comparison of carbon dioxide fluxes over three boreal black spruce forests in Canada, Global Change Biology, 13(1), 89–107, doi:10.1111/j.1365-2486.2006.01281.x, 2006.
Beringer, J.: Daly Uncleared OzFlux tower site OzFlux: Australian and New Zealand Flux Research and Monitoring hdl: 102.100.100/14239
Billesbach, D. and Bradford, J.: AmeriFlux US-AR2 ARM USDA UNL OSU Woodward Switchgrass 2, , doi:10.17190/AMF/1246138, 2016.
Brzostek, E. R., Dragoni, D., Schmid, H. P., Rahman, A. F., Sims, D., Wayson, C. A., Johnson, D. J. and Phillips, R. P.: Chronic water stress reduces tree growth and the carbon sink of deciduous hardwood forests, Global Change Biology, 20(8), 2531–2539, doi:10.1111/gcb.12528, 2014.
Chen, J., Shen, M. and Kato, T.: Diurnal and seasonal variations in light-use efficiency in an alpine meadow ecosystem: causes and implications for remote sensing, Journal of Plant Ecology, 2(4), 173–185, doi:10.1093/jpe/rtp020, 2009.
Calperum Tech: Calperum Chowilla OzFlux tower site OzFlux: Australian and New Zealand Flux Research and Monitoring hdl: 102.100.100/14236, 2013.
Clevery J. Alice Springs Mulga OzFlux site. OzFlux: Australian and New Zealand Flux Research and Monitoring
Dong, G., Guo, J., Chen, J., Sun, G., Gao, S., Hu, L. and Wang, Y.: Effects of spring drought on carbon sequestration, evapotranspiration and water use efficiency in the songnen meadow steppe in northeast China, Ecohydrology, 4(2), 211–224, doi:10.1002/eco.200, n.d.
Galvagno, M., Wohlfahrt, G., Cremonese, E., Rossini, M., Colombo, R., Filippa, G., Julitta, T., Manca, G., Siniscalco, C., Cella, U. M. di and Migliavacca, M.: Phenology and carbon dioxide source/sink strength of a subalpine grassland in response to an exceptionally short snow season, Environ. Res. Lett., 8(2), 025008, doi:10.1088/1748-9326/8/2/025008, 2013.
Göckede, M., Foken, T., Aubinet, M., Aurela, M., Banza, J., Bernhofer, C., Bonnefond, J. M., Brunet, Y., Carrara, A., Clement, R., Dellwik, E., Elbers, J., Eugster, W., Fuhrer, J., Granier, A., Grünwald, T., Heinesch, B., Janssens, I. A., Knohl, A., Koeble, R., Laurila, T., Longdoz, B., Manca, G., Marek, M., Markkanen, T., Mateus, J., Matteucci, G., Mauder, M., Migliavacca, M., Minerbi, S., Moncr…
Goldstein, A. H., Hultman, N. E., Fracheboud, J. M., Bauer, M. R., Panek, J. A., Xu, M., Qi, Y., Guenther, A. B. and Baugh, W.: Effects of climate variability on the carbon dioxide, water, and sensible heat fluxes above a ponderosa pine plantation in the Sierra Nevada (CA), Agricultural and Forest Meteorology, 101(2), 113–129, doi:10.1016/S0168-1923(99)00168-9, 2000.
Knohl, A., Schulze, E.-D., Kolle, O. and Buchmann, N.: Large carbon uptake by an unmanaged 250-year-old deciduous forest in Central Germany, Agricultural and Forest Meteorology, 118(3), 151–167, doi:10.1016/S0168-1923(03)00115-1, 2003.
Kurbatova, J., Li, C., Varlagin, A., Xiao, X. and Vygodskaya, N.: Modeling carbon dynamics in two adjacent spruce forests with different soil conditions in Russia, Biogeosciences, 5(4), 969–980, doi:10.5194/bg-5-969-2008, 2008.
Li, J.-H., Dugas, W. A., Hymus, G. J., Johnson, D. P., Hinkle, C. R., Drake, B. G. and Hungate, B. A.: Direct and indirect effects of elevated CO2 on transpiration from Quercus myrtifolia in a scrub-oak ecosystem, Global Change Biology, 9(1), 96–105, doi:10.1046/j.1365-2486.2003.00557.x, 2002.
Liddell, M., FLUXNET2015 AU-Rob Robson Creek, Queensland, Australia, 10.18140/FLX/1440203
Ma, S., Baldocchi, D., Wolf, S. and Verfaillie, J.: Slow ecosystem responses conditionally regulate annual carbon balance over 15 years in Californian oak-grass savanna, Agricultural and Forest Meteorology, 228–229, 252–264, doi:10.1016/j.agrformet.2016.07.016, 2016.
Marchesini, L., Papale, D., Reichstein, M., Vuichard, N., Tchebakova, N. and Valentini, R.: Carbon balance assessment of a natural steppe of southern Siberia by multiple constraint approach, Biogeosciences, 4(4), 581–595, doi:10.5194/bg-4-581-2007, 2007.
Matsumoto, K., Ohta, T., Nakai, T., Kuwada, T., Daikoku, K., Iida, S., Yabuki, H., Kononov, A. V., van der Molen, M. K., Kodama, Y., Maximov, T. C., Dolman, A. J. and Hattori, S.: Energy consumption and evapotranspiration at several boreal and temperate forests in the Far East, Agricultural and Forest Meteorology, 148(12), 1978–1989, doi:10.1016/j.agrformet.2008.09.008, 2008.
Merbold, L., Kutsch, W. L., Corradi, C., Kolle, O., Rebmann, C., Stoy, P. C., Zimov, S. A. and Schulze, E.-D.: Artificial drainage and associated carbon fluxes (CO2/CH4) in a tundra ecosystem, Global Change Biology, 15(11), 2599–2614, doi:10.1111/j.1365-2486.2009.01962.x, 2009.
Nakai, T., Kim, Y., Busey, R. C., Suzuki, R., Nagai, S., Kobayashi, H., Park, H., Sugiura, K. and Ito, A.: Characteristics of evapotranspiration from a permafrost black spruce forest in interior Alaska, Polar Science, 7(2), 136–148, doi:10.1016/j.polar.2013.03.003, 2013.
Noormets, A., Desai, A. R., Cook, B. D., Euskirchen, E. S., Ricciuto, D. M., Davis, K. J., Bolstad, P. V., Schmid, H. P., Vogel, C. V., Carey, E. V., Su, H. B. and Chen, J.: Moisture sensitivity of ecosystem respiration: Comparison of 14 forest ecosystems in the Upper Great Lakes Region, USA, Agricultural and Forest Meteorology, 148(2), 216–230, doi:10.1016/j.agrformet.2007.08.002, 2008.
Pendall, E., Griebel, A., (-) FLUXNET2015 AU-Cum Cumberland Plain, 10.18140/FLX/1440196
Pilegaard, K., Ibrom, A., Courtney, M. S., Hummelshøj, P. and Jensen, N. O.: Increasing net CO2 uptake by a Danish beech forest during the period from 1996 to 2009, Agricultural and Forest Meteorology, 151(7), 934–946, doi:10.1016/j.agrformet.2011.02.013, 2011.
Posse, G., Lewczuk, N., Richter, K. and Cristiano, P.: Carbon and water vapor balance in a subtropical pine plantation, iForest - Biogeosciences and Forestry, 9(5), 736, doi:10.3832/ifor1815-009, 2016.
Rambal, S., Joffre, R., Ourcival, J. M., Cavender‐Bares, J. and Rocheteau, A.: The growth respiration component in eddy CO2 flux from a Quercus ilex mediterranean forest, Global Change Biology, 10(9), 1460–1469, doi:10.1111/j.1365-2486.2004.00819.x, 2004.
Rey, A., Pegoraro, E., Tedeschi, V., Parri, I. D., Jarvis, P. G. and Valentini, R.: Annual variation in soil respiration and its components in a coppice oak forest in Central Italy, Global Change Biology, 8(9), 851–866, doi:10.1046/j.1365-2486.2002.00521.x, 2002.
Sabbatini, S., Arriga, N., Bertolini, T., Castaldi, S., Chiti, T., Consalvo, C., Njakou Djomo, S., Gioli, B., Matteucci, G. and Papale, D.: Greenhouse gas balance of cropland conversion to bioenergy poplar short-rotation coppice, Biogeosciences, 13(1), 95–113, doi:10.5194/bg-13-95-2016, 2016.
Suni, T., Rinne, J., Reissell, A., Altimir, N., Keronen, P., Rannik, U., Maso, M., Kulmala, M. and Vesala, T.: Long-term measurements of surface fluxes above a Scots pine forest in Hyytiala, southern Finland, 1996-2001, Boreal Environment Research, 8(4), 287–302, 2003.
Scott, R. L., Biederman, J. A., Hamerlynck, E. P. and Barron‐Gafford, G. A.: The carbon balance pivot point of southwestern U.S. semiarid ecosystems: Insights from the 21st century drought, Journal of Geophysical Research: Biogeosciences, 120(12), 2612–2624, doi:10.1002/2015JG003181, 2015.
Vesala, T., Suni, T., Rannik, Ü., Keronen, P., Markkanen, T., Sevanto, S., Grönholm, T., Smolander, S., Kulmala, M., Ilvesniemi, H., Ojansuu, R., Uotila, A., Levula, J., Mäkelä, A., Pumpanen, J., Kolari, P., Kulmala, L., Altimir, N., Berninger, F., Nikinmaa, E. and Hari, P.: Effect of thinning on surface fluxes in a boreal forest, Global Biogeochemical Cycles, 19(2), doi:10.1029/2004GB002316, 200…

## Sheet: Sheet1
(Ammann et al. 2007)
(Baldocchi 2016a)
(Beringer, 2013c)
(Beringer, 2013d)
(Beringer, 2013f)
(Billesbach & Bradford, 2016)
(Calperum Tech, 2013)
(Chen et al., 2009)
(Cleverly, 2011)
(Dong et al., 2011)
(Galvagno et al. 2013)
(Göckede et al. 2008)
(Goldstein et al., 2000)
(Knohl et al., 2003)
(Kurbatova et al. 2008)
(Li et al. 2003)
(Liddell, 2013)
(Marchesini et al., 2007)
(Margolis, 2016)
(Merbold et al., 2009)
(Nakai et al. 2013)
(Noormets et al. 2008)
(Pendall, 2015)
(Philip 2016)
(Pilegaard et al., 2001)
(Posse et al., 2016)
(Rambal et al. 2004)
(Rey et al. 2002)
(Sabbatini et al., 2016)
(Sabbatini et al., 2016)
(Scholes et al., 2001)
(Scott, 2016b)
(Suni et al. 2003)
(Vesala et al., 2005)
(Yamazaki et al., 2013)
